# Supplementary material for: A Mindful Path Toward Prejudice Reduction: Key Mindfulness Facets and Mediators for Promoting Positive Intergroup Relations
Source: Springer Nature journal article supplement (doi:10.1007/s12671-023-02242-0), 2023-10-24
Supplement: MOESM1 [file 26219478]

**Supplementary materials for the paper “A mindful path toward prejudice reduction: Key mindfulness facets and mediators for promoting positive intergroup relations”**

Table S1. Pearson correlations between the variables of Study 1 (Wave 1 in the lower triangle, Wave 2 in the upper triangle)

|  | W1 *M*(*SD*) | W2 *M*(*SD*) | 1. | 2. | 3. | 4. | 5. | 6. | 7. | 8. | 9. |
| --- | --- | --- | --- | --- | --- | --- | --- | --- | --- | --- | --- |
| 1. Age | - | - |  | 0.23* | 0.02 | 0.13 | -0.06 | -0.09 | -0.08 | 0.17 | -0.06 |
| 2. Nonreactivity | 2.61(0.65) | 2.61(0.65) | 0.15 |  | 0.17 | 0.26** | 0.14 | 0.01 | 0.15 | -0.02 | 0.12 |
| 3. Awareness | 3.89(0.74) | 3.75(0.75) | -0.05 | 0.04 |  | 0.39*** | 0.52*** | 0.01 | 0.09 | -0.06 | 0.01 |
| 4. Nonjudging | 3.08(0.84) | 3.05(0.91) | 0.09 | 0.15 | 0.33*** |  | 0.28** | -0.11 | -0.04 | -0.04 | -0.04 |
| 5. Describing | 3.34(0.95) | 3.38(0.93) | -0.02 | 0.25* | 0.37*** | 0.42*** |  | 0.02 | 0.17 | -0.20* | 0.18 |
| 6. Observing | 3.21(0.90) | 3.34(0.99) | -0.09 | 0.03 | 0.09 | -0.25* | 0.05 |  | 0.27** | -0.24* | 0.17 |
| 7. Attitudes toward immigrants | 2.67(0.65) | 2.71(0.50) | -0.22* | -0.10 | 0.04 | 0.02 | 0.17 | 0.24* |  | -0.67*** | 0.60*** |
| 8. Prejudice toward immigrants | 1.11(0.68) | 1.05(0.70) | 0.06 | 0.05 | -0.09 | -0.15 | -0.23* | -0.21* | -0.63*** |  | -0.69*** |
| 9. Deprovincialization | 3.07(0.62) | 3.02(0.68) | -0.08 | 0.09 | 0.12 | -0.03 | 0.19 | 0.29** | 0.55*** | -0.69*** |  |

Notes. * *p* < 0.05; ** *p* < 0.01; *** *p* < 0.001; Awareness = Acting with Awareness; W1 = Wave 1; W2 = Wave 2; *M* = mean; *SD* = standard deviation

Table S2. Pearson correlations between the variables of Study 2

|  | *M*(*SD*) | 1. | 2. | 3. | 4. | 5. | 6. | 7. | 8. | 9. | 10. | 11. | 12. | 13. | 14. |
| --- | --- | --- | --- | --- | --- | --- | --- | --- | --- | --- | --- | --- | --- | --- | --- |
| 1. Age | - |  |  |  |  |  |  |  |  |  |  |  |  |  |  |
| 2. Nonreactivity | 2.86(0.67) | 0.09* |  |  |  |  |  |  |  |  |  |  |  |  |  |
| 3. Awareness | 3.67(0.78) | 0.12** | 0.03 |  |  |  |  |  |  |  |  |  |  |  |  |
| 4. Nonjudging | 3.46(0.87) | 0.14*** | 0.15*** | 0.56*** |  |  |  |  |  |  |  |  |  |  |  |
| 5. Describing | 3.46(0.76) | 0.06 | 0.31*** | 0.30*** | 0.26*** |  |  |  |  |  |  |  |  |  |  |
| 6. Observing | 3.07(0.77) | -0.00 | 0.36*** | -0.18*** | -0.21*** | 0.27*** |  |  |  |  |  |  |  |  |  |
| 7. Reflection | 3.63(0.75) | 0.02 | 0.22*** | 0.06 | -0.04 | 0.36*** | 0.45*** |  |  |  |  |  |  |  |  |
| 8. Joyous Exploration | 3.78(0.76) | -0.07 | 0.31*** | 0.11** | 0.04 | 0.30*** | 0.33*** | 0.46*** |  |  |  |  |  |  |  |
| 9. Stress Tolerance | 5.35(0.88) | 0.07 | 0.22*** | 0.35*** | 0.39*** | 0.32*** | 0.07 | 0.14*** | 0.23*** |  |  |  |  |  |  |
| 10. Social Curiosity | 3.66(0.90) | -0.18*** | 0.06 | -0.19*** | -0.17*** | 0.12** | 0.25*** | 0.27*** | 0.26*** | -0.11** |  |  |  |  |  |
| 11. Attitudes toward immigrants | 2.99(0.77) | 0.03 | 0.15*** | 0.06 | 0.07 | 0.24*** | 0.18*** | 0.26*** | 0.27*** | 0.12** | 0.16*** |  |  |  |  |
| 12. Prejudice toward immigrants | 1.00(0.76) | 0.01 | -0.10** | -0.13*** | -0.12** | -0.22*** | -0.17*** | -0.33*** | -0.25*** | -0.18*** | -0.13** | -0.68*** |  |  |  |
| 13. Deprovincialization | 3.14(0.75) | 0.02 | 0.10** | 0.10* | 0.09* | 0.22*** | 0.27*** | 0.37*** | 0.41*** | 0.22*** | 0.19*** | 0.57*** | -0.63*** |  |  |
| 14. Positive contact | 2.35(0.87) | -0.09* | 0.09* | -0.01 | 0.04 | 0.14*** | 0.23*** | 0.22*** | 0.25*** | 0.16*** | 0.08* | 0.44*** | -0.46*** | 0.43*** |  |
| 15. Negative contact | 1.37(0.85) | -0.18*** | -0.03 | -0.08* | -0.06 | -0.01 | -0.04 | -0.07 | -0.09* | -0.03 | -0.01 | -0.35*** | 0.38*** | -0.32*** | 0.05 |

Notes. * *p* < 0.05; ** *p* < 0.01; *** *p* < 0.001; Awareness = Acting with Awareness; *M* = mean; *SD* = standard deviation
